# Supplementary material for: 1,25-Dihydroxyvitamin D to PTH(1–84) Ratios Strongly Predict Cardiovascular Death in Heart Failure
Source: PLoS One. 2015 Aug 26;10(8):e0135427. doi: 10.1371/journal.pone.0135427 (PMC4550259; doi:10.1371/journal.pone.0135427)
Supplement: S1 Dataset — (XLSX) [file pone.0135427.s001.xlsx]

## Sheet: Dataset PLOS ONE
SEXE	EF (%)	cre	Creat (µmol)	GFR (mL/min/1.73 m2)	AGE	Calcium total	Vitamine D Liaison (ng/mL)	Vit D1,25 (pg/mL)	PTH 1-84 Liaison (pg/mL)	Nt-proBNP ROCHE (pg/ml)	BNP DxI (pg/mL)	Galectin-3 ELISA (ng/ml)	CgA (UI/L)	NYHA	Etiology	OUTCOME
M	24	1.3	114.92	57.2	74.6886	9.2	16.4	28.5	27.7	545	172.2	17.8	33.54	III	ISCH	Y
M	25	1.1	97.24	79.2	39	10.2	19	43	7.1	582	94	12.34	4.9	II	DCM	N
M	14	1.2	106.08	71.5	39.269	9.9	45.9	34.4	17.9	574	159.2	19.1	10.48	II	DCM	N
M	23	1	88.4	79.2	67.1923	7.8	14.9	30.8	29.6	1228	281	25.3	109.11	III	ISCH	Y
M	17	1.2	106.08	64.2	67	8.8	35	30.8	47	8841	3183	21.49	47.6	III	DCM	Y
M	25	1	88.4	79.1	67.5181	9.6	19.7	31	26	113	42.4	21.1	103.47	III	ISCH	N
M	32	1.2	106.08	67.1	54.0068	9.1	23.4	48.8	23.5	223	90	11	27.52	II	ISCH	N
M	34	1	88.4	75.8	83	9.1	7	42.4	39.8	1978	313	24.56	19.5	II	ISCH	N
M	26	1.2	106.08	64.3	66.5708	9.3	12.3	26.9	14.5	900	331	11.3	26.83	II	ISCH	N
M	29	1.1	97.24	70.8	68	10	5	33.3	38.1	646	172	19.05	18.5	II	ISCH	Y
M	35	1	88.4	80.8	60.6516	8.3	9.61	74.1	27.2	1799	288.6	12.2	70.73	II	ISCH	N
M	19	1.3	114.92	60.1	59	9.3	7	36.1	96	6176	1129	16.02	15.5	III	ISCH	Y
M	26	1.4	123.76	52.8	73.0103	8.3	6.98	32.9	35.6	586	105.8	20.8	61.91	III	ISCH	Y
M	20	2.8	247.52	23.1	84	9	8	27.6	157	23952	3422	45.46	87.6	III	ISCH	N
M	17	1.5	132.6	50.6	61	9.3	11	38.9	45.4	462	62	7.85	34.6	II	ISCH	Y
M	30	1.5	132.6	49.5	68	8.4	15.6	8.86	34.6	2443	345	19.29	52.6	III	ISCH	Y
M	13	1	88.4	83.2	52.5421	8	17.1	24.7	8.7	1872	687.3	16.7	7.89	III	DCM	N
M	19	1	88.4	78.5	70.0233	9.2	24.7	23.6	12.4	2225	549.4	16.8	22.35	III	ISCH	Y
M	16	1.2	106.08	67.4	52.8515	8.6	8.02	20.8	202	1839	1588	25.8	72.51	III	ISCH	Y
M	15	1.6	141.44	51.1	40.0602	8.8	9.52	19.6	60.8	3500	1403.3	16.1	240.4	III	DCM	Y
M	13	1.1	97.24	70.5	69.3032	7.8	12.3	15	56.8	1729	212.3	30.7	111.46	III	ISCH	Y
M	19	1.5	132.6	49.6	66.8994	9	9.95	10.9	18.3	1156	1188.7	13.7	40.43	III	DCM	Y
M	25	1.1	97.24	75.3	50.1437	8.8	6.37	22.2	59.2	1223	410.6	13.3	9.47	III	ISCH	N
M	20	1.6	141.44	48.7	51	9.1	10.9	12.7	41.7	33020	5017	20.9	22.7	III	DCM	Y
M	20	2.6	229.84	25.6	76.7775	8.3	10.9	8.02	60.7	4175	587.9	24.5	90.61	III	DCM	Y
M	16	1.3	114.92	57	76	9.4	11	11.4	19	5815	931	18.9	22.2	IV	ISCH	N
M	24	0.8	70.72	102.9	65.5688	8.5	6.86	19.2	43.3	3673	578.9	16.8	33.75	III	ISCH	Y
F	31	1.5	132.6	35.3	81.9986	8.6	10.6	18.7	56.2	4183	699.3	21.6	59.96	III	ISCH	Y
M	31	1	88.4	81.3	59.1075	9.1	16.1	52.4	26.5	2146	979.7	12	29.58	II	DCM	N
M	25	1.1	97.24	75	51	10.4	15	40.4	20.1	693	151	10.89	15.3	II	DCM	N
M	11	1.5	132.6	51.7	54.5188	8.4	22.5	34.6	78.3	7192	1669.7	19.6	15.16	III	ISCH	Y
M	33	1.3	114.92	56.7	78.6037	9.5	28.3	36	28.7	1999	380.4	14.3	43.71	II	DCM	N
F	26	1.3	114.92	43	70.026	8.4	15.4	35.6	31.2	392	93.4	19.2	26.83	II	DCM	N
M	32	1.2	106.08	62.7	75.332	9.3	22.3	40.4	21.2	643	103.1	21.3	25.41	II	ISCH	N
F	27	0.8	70.72	79.9	52.4956	9.4	34.2	65.2	11.9	504	99.7	12.2	14.31	II	DCM	N
M	20	1.1	97.24	73	58.4476	9	34.1	37.3	4	500	201.3	10.7	8.12	II	ISCH	N
M	19	1.9	167.96	36.1	83.3101	8.4	18.8	26.8	76.8	2533	867.4	21.1	37.79	III	ISCH	Y
M	11	1.8	159.12	40.7	63.0445	8.9	16.5	34.1	87.2	2080	537.7	11.1	32.35	III	ISCH	Y
M	31	1.3	114.92	58.1	69.4511	8.5	21.5	26.9	23.9	95	49	16.9	25.99	II	ISCH	Y
M	16	1.5	132.6	48.5	75.217	9.9	16.4	39.4	85.4	2276	1004.4	18.6	31.76	II	ISCH	Y
M	22	1.3	114.92	57.1	75.9425	8	35.5	70.1	46.5	8906	2343.6	29.8	35.26	III	ISCH	Y
M	24	0.7	61.88	127.2	49.4319	8.7	8.72	50.2	38.2	3291	1077.7	15.4	6.83	III	ISCH	N
M	14	1	88.4	82.4	55.0801	8.7	6.81	32.6	25.3	929	165.2	17.5	13.23	IV	DCM	N
M	24	1	88.4	78.5	70.0452	8.9	6.49	34.7	28.5	4179	814.1	18	15.68	III	ISCH	Y
M	26	1.4	123.76	51.8	80.4435	8.7	12.3	49.5	29.1	1305	259.2	19.7	84.14	III	ISCH	N
M	23	1.2	106.08	65.6	60.1862	9.2	8.49	51.5	49.3	571	163.1	14.4	19.02	II	ISCH	Y
M	8	1.1	97.24	74.5	52.6735	9.9	7.5	35.6	39	304	307	18	59.89	III	ISCH	N
M	11	1.5	132.6	50.5	61.1472	10.8	5.69	33.1	98	644	388.9	19.8	19.46	III	ISCH	Y
M	28	2.8	247.52	24.4	62.9979	9.3	14.2	22.3	46.7	3276	569.4	18.4	59	II	ISCH	Y
M	33	1.8	159.12	38.2	86.4066	8.4	17	17.9	65	3219	266.4	30.8	98.8	II	ISCH	Y
M	28	4.6	406.64	13.4	72	8.8		11.4	38.6	17035	1650	30.83	186.7	III	ISCH	Y
M	33	0.8	70.72	107.8	52.2245	8.7	15.3	18.5	9.6	552	183.4	12.1	32.64	II	ISCH	N
F	33	1.1	97.24	50.2	84.7118	9.9	16.3	12.5	23.8	749	86.8	21.8	121.74	III	ISCH	Y
M	19	3	265.2	22.4	65	8.3	13	18.9	34.6	6360	1550	21.85	403	III	ISCH	Y
M	15	2.2	194.48	31.6	69.7413	8.8	17.6	8.32	15.9	3727	879.2	25	60.19	III	ISCH	Y
M	29	0.9	79.56	89	68.6023	8.9	20.1	20.8	39.9	358	87.1	15.3	18.1	II	ISCH	N
M	14	1.4	123.76	52.9	72.5777	9.3	15.4	15.5	49.8	967	243.6	17.3	14.26	IV	ISCH	Y
M	18	1.7	150.28	43.9	59.8467	9.2	14.8	21.3	25.8	426	96.5	14.2	51	II	ISCH	Y
M	24	2	176.8	33.9	85.7906	9.2	16.4	20	166	888	268.5	34.9	59.23	III	ISCH	Y
M	22	2.2	194.48	31.5	71	8.4	24	7.48	34.6	4036	380	26.6	422	III	ISCH	Y
M	35	1.1	97.24	72.4	60.5366	9.5	21.1	21.8	34.5	3174	195.8	14.8	16.08	IV	ISCH	N
M	16	1.3	114.92	58.3	68	9.5	11	23.2	55.1	3532	489	11.71	288.7	III	ISCH	Y
M	10	1.5	132.6	52.2	52.0465	8.2	7.89	6.03	33.8	8560	2276	31.3	340.41	IV	ISCH	Y
M	16	2	176.8	36.6	58.1903	9.2	11.7	11	51.3	3140	731.6	33.6	48.47	III	ISCH	Y
M	27	1.3	114.92	56.1	82.1739	8.9	11.5	25.1	40.2	1616	239.3	17.6	45.44	III	DCM	Y
M	13	1.8	159.12	41.6	56.6188	8.9	10.9	20.5	53.1	1874	343.9	13	14.6	III	ISCH	Y
M	25	1.2	106.08	66.6	55.7919	9	9.29	21	33.6	71	43.2	15.9	42.38	III	ISCH	N
M	25	0.9	79.56	85.6	83.4223	8.7	9.58	15.8	30.7	1868	484.7	19.3	16.95	III	ISCH	Y
M	25	1.8	159.12	41.3	59	9	6	5.19	56.8	6467	2050	26.44	31.1	IV	ISCH	Y
M	21	6.5	574.6	9.4	57.5277	7.9	7.68	5	244	11595	587	38.7	244.08	III	ISCH	Y
M	10	1	88.4	85.6	45.7248	9.4	6.97	21.6	48.1	3940	1774.8	10.6	15.92	III	DCM	N
M	30	1.3	114.92	60.7	56.0301	9.4	21.2	29.4	38.7	522	334.8	14.9	23.6	II	DCM	Y
M	29	0.8	70.72	114.7	38.5106	9.1	30.3	40.1	6.2	161	40.3	12.5	7.41	II	DCM	N
F	31	1.3	114.92	42.9	71.269	9.1	18.1	29.9	43.9	267	54.1	21.8	134.94	II	DCM	N
M	15	1.1	97.24	89.9	20.9062	9.1	46.1	42.7	18.4	764	275.2	13.3	8.33	II	DCM	Y
M	11	1	88.4	75.7	84	9.4	25	40.9	13	4936	1491	12.43	16.9	III	ISCH	Y
F	27	0.7	61.88	105.2	28.8761	9.8	18.2	51.3	11.7	863	126.2	12.9	4.92	II	DCM	N
F	17	0.7	61.88	100.4	36.4846	9.4	27.7	35.9	9.3	319	87.1	12.4	11.92	II	DCM	N
F	30	0.8	70.72	84.7	39.332	8.7	19	100	87.3	3543	663.4	11.6	11.92	III	DCM	N
M	25	0.9	79.56	91.3	60.5667	9.4	27	28.8	14	923	430.2	13.5	86.76	III	DCM	Y
M	17	1.1	97.24	74.7	52	8.9	17	43.7	42.1	13633	2967	19.4	10.2	III	DCM	N
M	23	2.6	229.84	25.6	77.0623	8.6	21.7	39.4	122	1130	106	43.9	136.39	III	ISCH	Y
M	14	0.9	79.56	92.9	55.7344	8.7	14.1	32.1	10.7	347	125.3	13.4	56.46	III	DCM	N
M	28	1.4	123.76	52.4	75.4305	9.1	14	25.6	28.8	1241	142.2	24.8	25.34	III	DCM	N
M	30	1.4	123.76	51.5	82.4504	9.5	13.3	27.9	32.8	837	221.9	13.9	38.16	II	ISCH	Y
M	33	1.1	97.24	69.8	72.9446	9.4	18.8	28.3	21.6	3180	695.8	12.2	26.68	II	ISCH	Y
M	21	2.6	229.84	25.3	80.4079	9.3	13.9	26.4	39.8	4938	1255.5	30.4	113.1	III	ISCH	Y
F	24	1	88.4	60	60.5914	9.4	23.8	31.8	10.8	702	181.6	9.8	15.44	III	DCM	Y
M	32	1.9	167.96	36.6	78	8.8	20.9	27.2	21	5315	685	20	85.1	II	ISCH	N
M	13	1.3	114.92	59.1	64	8.9	19.2	32.4	34.4	1432	316	14.26	17.7	IV	ISCH	Y
M	25	1.3	114.92	65.2	39.2334	8.6	15.2	39	30.6	834	17	14	23.4	III	DCM	N
M	25	1.2	106.08	64.1	67.2361	10.1	16.2	34.6	24.7	890	219.3	14.6	11.72	II	ISCH	Y
M	19	1.5	132.6	48.2	77.3279	8.8	19.6	33.8	37.9	4152	622.1	14.4	47.42	III	ISCH	Y
F	21	1.3	114.92	41.8	81.0842	8.4	14.1	56	12.3	761	240.8	11.7	190.38	II	ISCH	N
F	20	2	176.8	25.5	79.0171	8.7	12.5	30	67.5	8097	1783.3	30	83.71	II	ISCH	N
M	31	1.2	106.08	61.6	82	8.9	15	60.5	35.7	2168	332	11.39	39.7	II	ISCH	N
M	17	1.7	150.28	41	84	8.1	15	26.6	144	13197	4408	29.36	86.8	III	ISCH	Y
F	35	1.3	114.92	42.3	76.0027	8.4	22.3	42.3	10	229	66.5	16.3	14.82	II	DCM	N
M	10	0.8	70.72	104.4	61.295	8.8	19.6	45.5	36.7	2624	604.5	18.2	44.37	III	ISCH	Y
M	11	2.4	212.16	28.1	76.4873	9	16.2	31	201	8102	1721.3	20.7	51.73	III	ISCH	Y
M	25	1	88.4	83.7	51.0089	9	19.5	29.4	18.7	200	79.8	13.8	345.07	II	ISCH	Y
F	30	0.9	79.56	76.5	33.2594	9.8	11.4	66.1	17.6	179	21.3	11.5	12.83	II	DCM	N
M	26	0.9	79.56	94.2	52	9.6	9	53.3	37.4	817	299	10.29	12.9	II	DCM	N
M	32	1.2	106.08	61.1	85.7057	9.5	10.2	26.5	61.8	1626	563.6	18.1	34.84	III	ISCH	Y
F	25	0.9	79.56	67.3	62.6968	8.6	10	40.2	55.5	66	22	13.8	15.05	III	DCM	N
M	27	0.9	79.56	85.8	82.5243	8.2	7.83	33.3	31.9	3356	894.4	14.9	16.59	II	ISCH	Y
M	24	0.9	79.56	90.6	62.8309	9	12.1	40.2	22.1	76	56.9	9.8	15.6	II	ISCH	N
M	13	1.7	150.28	40.8	86.475	8.3	9.04	38.4	23	7765	1324.5	13.7	23.87	III	ISCH	Y
F	22	1.2	106.08	45.5	84	10	8	35.8	66.2	5955	1340	17.71	11.9	III	ISCH	N
M	18	1.4	123.76	51.1	85.681	8.4	7.21	35.4	59.2	11481	1332.2	21.5	383.88	IV	ISCH	Y
M	23	1.6	141.44	44.1	83	8.8	7	47.8	105	29925	2527	27.85	80.9	IV	ISCH	Y
F	15	1.3	114.92	43.6	65.9822	8.5	9.34	29.6	142	7192	1941.8	23.6	60.21	III	ISCH	Y
M	17	2.1	185.64	35	55.2471	9.3	11.1	40.9	84.6	620	482.5	14.2	13.67	III	DCM	Y
F	28	1.3	114.92	42.5	74.3299	9.2	9.61	63.8	69.2	467	114.6	12.9	37.74	II	ISCH	N
M	26	1	88.4	79.7	65	8.6	5	45.4	22.5	168	47	11.84	7.8	II	DCM	N
M	15	1.7	150.28	43.7	61.1773	9.1	8.36	32	82.4	3378	193.5	25	47.5	III	ISCH	Y
F	15	1	88.4	56.1	84	8.3	5	63.4	58	4345	468	22.26	20.8	III	ISCH	N
F	28	1	88.4	55.8	86.2943	8.6	7.96	35.6	29.8	3908	779.9	14	28.09	III	ISCH	Y
M	8	0.6	53.04	144.6	63	8.5	5	44.6	31.2	5232	640	15.69	12.4	III	DCM	Y
F	28	2.25	198.9	22.2	79.8932	9.3	6.8	26.7	58.9	638	140.6	14.8	27.62	III	ISCH	N
M	27	0.8	70.72	107.1	53.9685	8.8	7.36	60.7	29.6	908	277.9	14.7	12.31	II	ISCH	N
M	9	1.3	114.92	59	64.5284	9.2	20.4	24.4	39.5	8629	2983.3	17.5	66.13	III	DCM	Y
M	27	1.5	132.6	47.9	80.0548	9.4	24.3	17.9	50.4	3704	449.3	22.5	339.38	III	DCM	Y
F	35	1.5	132.6	36.8	67.05	8.3	12.8	15.6	45	13258	248.5	24.9	27.95	II	DCM	Y
M	22	0.9	79.56	87.4	75.0418	8.9	14.1	21.9	26.2	4635	687.2	11.4	19.34	III	ISCH	Y
M	19	3.2	282.88	20.4	72	8.9	16	9.89	51.9	21295	2594	49.59	319	IV	ISCH	Y
M	23	2.7	238.68	24	84.6543	8.3	15.9	17.1	46.5	2277	300.4	18.3	72.28	III	ISCH	N
F	30	0.9	79.56	64.6	76.512	9.2	23.4	23.1	11.6	1492	348.7	16.1	49.05	III	ISCH	Y
M	22	0.8	70.72	99.1	78.8611	8.1	13.5	20.8	13	2303	427.8	20.1	53.26	III	ISCH	N
M	17	0.8	70.72	105.9	57	8.2	34	22.2	29.1	21153	4209	19.13	29	IV	ISCH	Y
M	22	1.5	132.6	49.2	69.7221	9.7	22.6	19.4	26.9	2236	460.5	15.7	29.98	III	ISCH	N
M	14	1.8	159.12	38.8	79.6057	8.5	22.3	18.2	40.4	667	108.7	19.5	85.74	II	DCM	N
M	18	1.2	106.08	68.1	50.1629	9.2	30.5	9.11	31.7	5182	1267.8	31.4	9.38	IV	DCM	Y
M	30	1.2	106.08	62.9	74.0287	8.3	17.7	10.4	26.9	261	204.9	17.4	19.52	III	ISCH	Y
M	30	1.7	150.28	42.1	74.1875	9;1	20.7	9.54	46.1	1651	389.1	24.8	46.78	III	ISCH	N
M	30	1.6	141.44	45.3	72.7365	8.3	16.4	22.4	21.2	780	111.9	15.1	17.65	II	DCM	Y
F	32	1.1	97.24	51.6	73.8097	8.8	28.3	19.6	25.1	3215	1772.5	22.6	117.22	III	ISCH	Y
F	22	1.3	114.92	45.3	54.6037	8.6	13.6	17.4	63.1	836	125	22.3	56.76	II	ISCH	N
M	23	1.2	106.08	62.6	75.9644	8.8	16.6	20.5	27.9	652	81.4	12.4	35.94	II	ISCH	Y
M	26	5.3	468.52	11	86.8227	9.2	21.2	15.6	51.1	6231	1098.1	38.3	261.06	III	ISCH	Y
F	18	1.4	123.76	38.4	80.4271	8.8	5.06	25.2	78.8	1212	3763.8	22.6	102.66	III	DCM	Y
M	12	1.6	141.44	50.6	42.2313	8.9	11.4	6.24	35.2	4555	1360.4	24	16.98	IV	DCM	Y
M	25	1.2	106.08	67.9	50.7105	8.3	8.38	13.8	40.8	3179	3801.2	17.3	75.04	II	DCM	N
F	25	1.5	132.6	35.2	83.8686	9.7	5.27	10.2	47.1	22237	2353.8	24.2	379.81	III	ISCH	Y
M	22	3.4	300.56	22.2	33.2402	6.2	4.32	25	178	25000	4027.3	27.9	204.49	III	ISCH	N
M	18	1.3	114.92	55.8	84.8953	9.1	11.7	22	41	20166	2067.7	27.2	46.52	III	DCM	Y
M	23	1.3	114.92	56.7	78.026	9.7	8.99	11	42	10058	1163.3	14.2	40.3	III	ISCH	Y
F	22	1.3	114.92	41.4	84.6762	7.9	10.4	12.7	39.9	3789	337.8	30.6	76.77	III	ISCH	Y
M	28	1.2	106.08	63.1	72.6078	8.6	9.57	16.2	11.7	4897	1838.8	14.1	21.98	III	ISCH	Y
F	32	0.7	61.88	89.7	63.4908	8.8	9.98	22.8	19	172	45.9	16.3	22.32	II	DCM	N
M	24	1.4	123.76	52.5	74.8419	8	8.44	6.19	21.2	25000	3112.8	23.8	64.042	III	ISCH	Y
F	25	3.4	300.56	13.8	79.6934	8.7	8.99	5	48	1415	275	31.4	100.96	III	DCM	Y
M	26	1.4	123.76	52.5	75	9.9	11	17.4	44.2	5044	1183	16.4	34.8	III	ISCH	Y
M	19	1.1	97.24	67	88.8789	8.9	8.47	19.9	17.6	6736	1586.3	13.4	40.17	II	ISCH	Y
M	29	2.1	185.64	33.7	66.8802	8.9	10.8	16.7	40	10176	2585	18.2	80.66	II	ISCH	Y
M	10	1.5	132.6	53.9	44.5339	9.1	6.9	14	66.6	2114	1014.6	22.1	37.25	III	ISCH	Y
F	23	0.9	79.56	64.5	77	8.3	6	16.1	27.9	26875	4110	9.92	59.5	II	ISCH	Y
M	28	1.9	167.96	36.4	80.0274	9.2	8	25.2	71.2	1757	199.9	29.6	35.68	II	ISCH	N
F	19	1.3	114.92	43.2	69	9	10	16.1	33.7	3392	644	17.05	22.5	III	DCM	Y
F	31	1.4	123.76	38	84.9035	8.5	5.49	12.3	43.5	9245	1278.1	16.2	44.58	II	DCM	Y
M	14	1.1	97.24	71.3	65.5441	8.6	9.33	20.5	47.4	8564	944.7	23.6	45.33	III	DCM	Y
M	25	1.9	167.96	35.9	86	8.8	9	18.4	53.3	1509	182	42.33	41.9	II	ISCH	N
F	26	1	88.4	55.8	86.7762	9.3	5.13	8.34	29	750	144.9	21.4	53.18	III	ISCH	Y
M	31	1.1	97.24	72	62.5325	8	5.18	14.2	14.3	2347	1171.4	23.5	23.9	II	ISCH	Y
M	20	1.4	123.76	54.4	63.1841	9.4	8.51	9.57	38.9	1133	173.1	20.5	32.01	II	ISCH	N
F	17	0.8	70.72	81	49.1581	7.9	9.2	23.8	49.4	4692	1852.1	23.6	27.03	IV	ISCH	Y
M	27	1.8	159.12	39.3	74.5708	9.2	9.12	12.5	46.8	8092	848	20.8	71.32	IV	ISCH	Y
F	16	1.9	167.96	28.7	59.6824	10.4	9.97	7.67	58.1	445	1259.9	25.8	27.51	IV	ISCH	Y
F	28	0.8	70.72	72.3	85.87	8.7	6.29	23.2	38.4	11951	2674	18.1	14.97	III	ISCH	Y
M	27	1.4	123.76	55.3	58	8.3	6	7.94	25.1	4837	782	17.4	61.7	III	ISCH	N
